# Supplementary material for: Impacts of maternal microbiota and microbial metabolites on fetal intestine, brain, and placenta
Source: PubMed Central journal article supplement (PMC10552303; doi:10.1186/s12915-023-01709-9), 2023-10-04
Supplement: 12915_2023_1709_MOESM2_ESM.pdf [file 12915_2023_1709_MOESM2_ESM.pdf]

Supplementary Figures

# **Husso et al. 2023 Impacts of maternal microbiota and microbial metabolites on fetal intestine, brain and placenta**

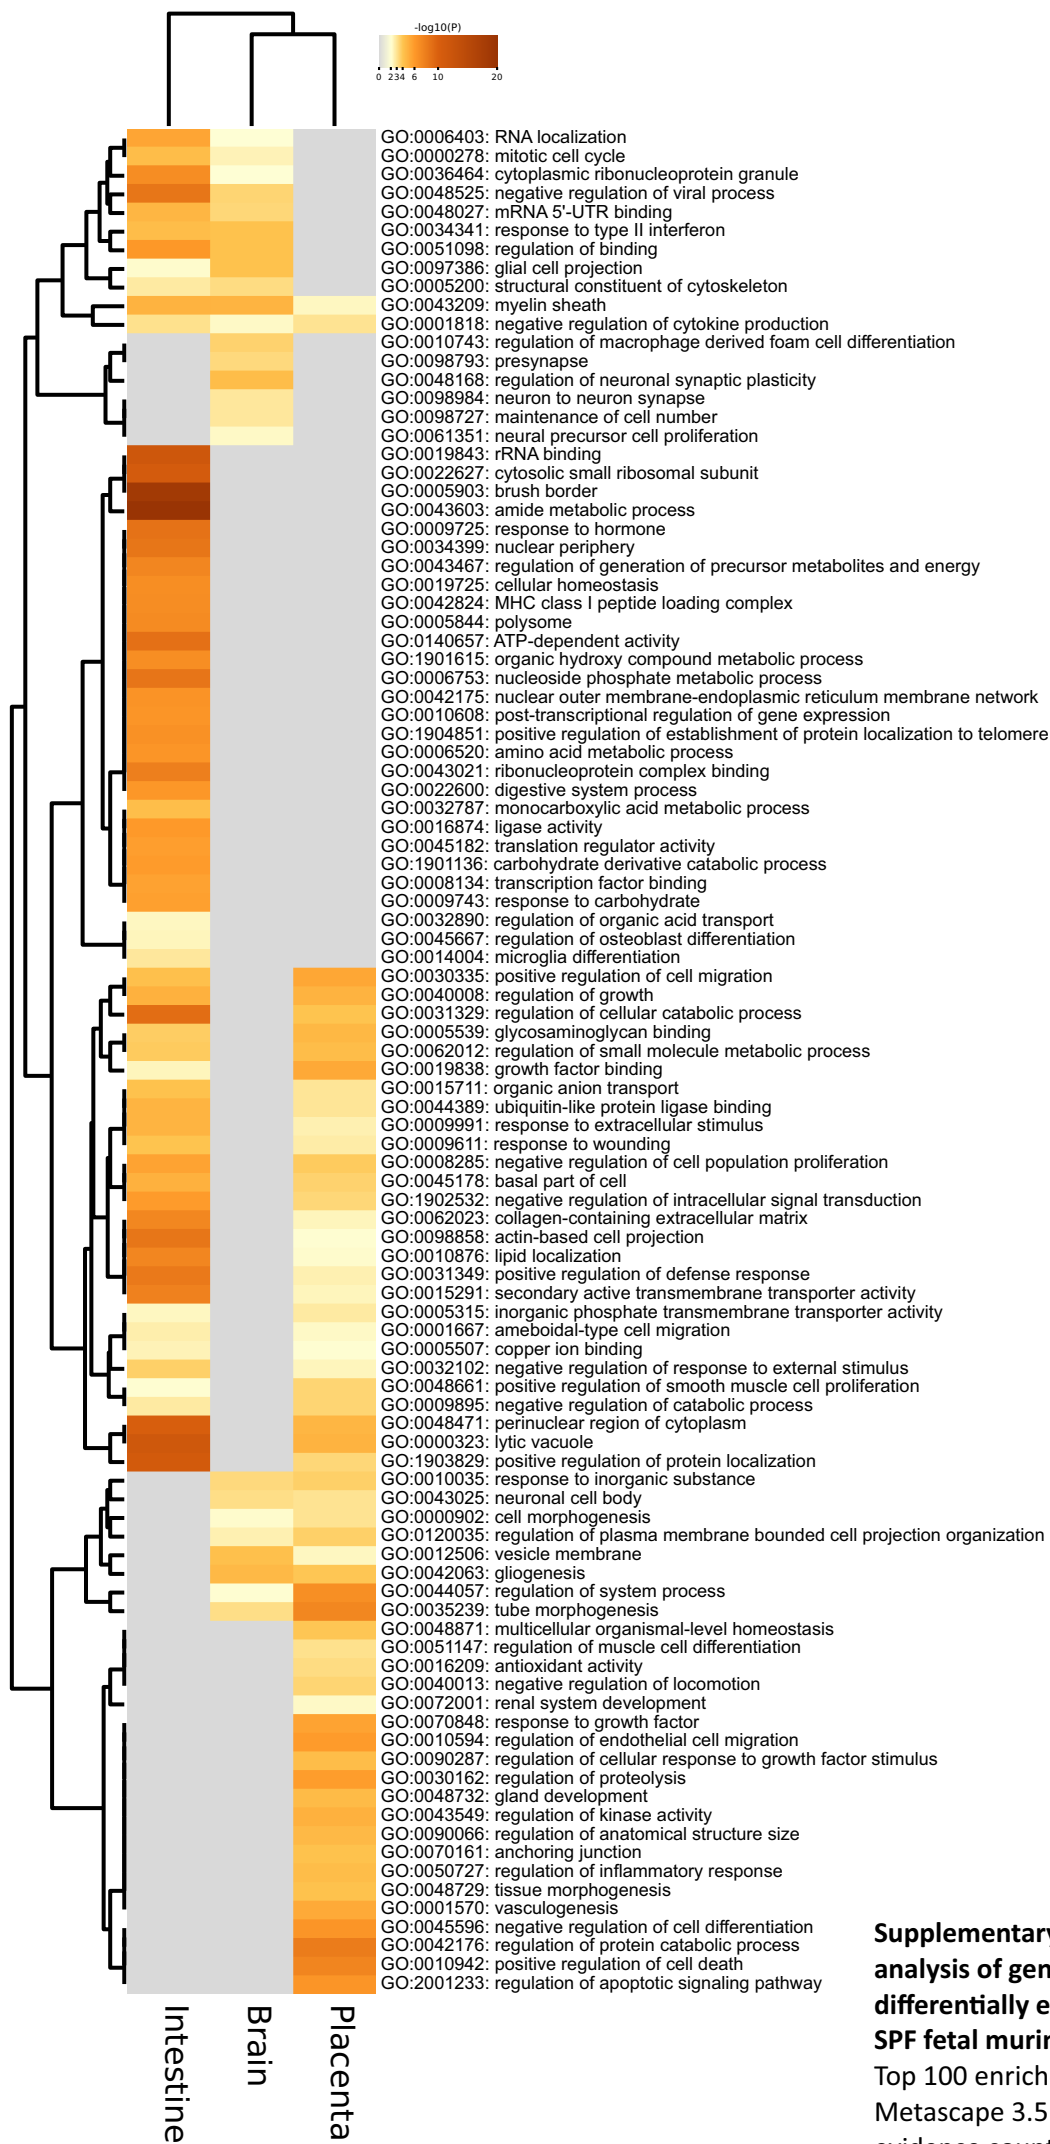

**Supplementary Figure 1. Over-representation analysis of genes which were significantly differentially expressed ( $q < 0.05$ ) in GF versus SPF fetal murine intestine, brain and placenta. Top 100 enriched ontology terms are shown. Metascape 3.5 using gene prioritization by evidence counting and selective GO clusters.**

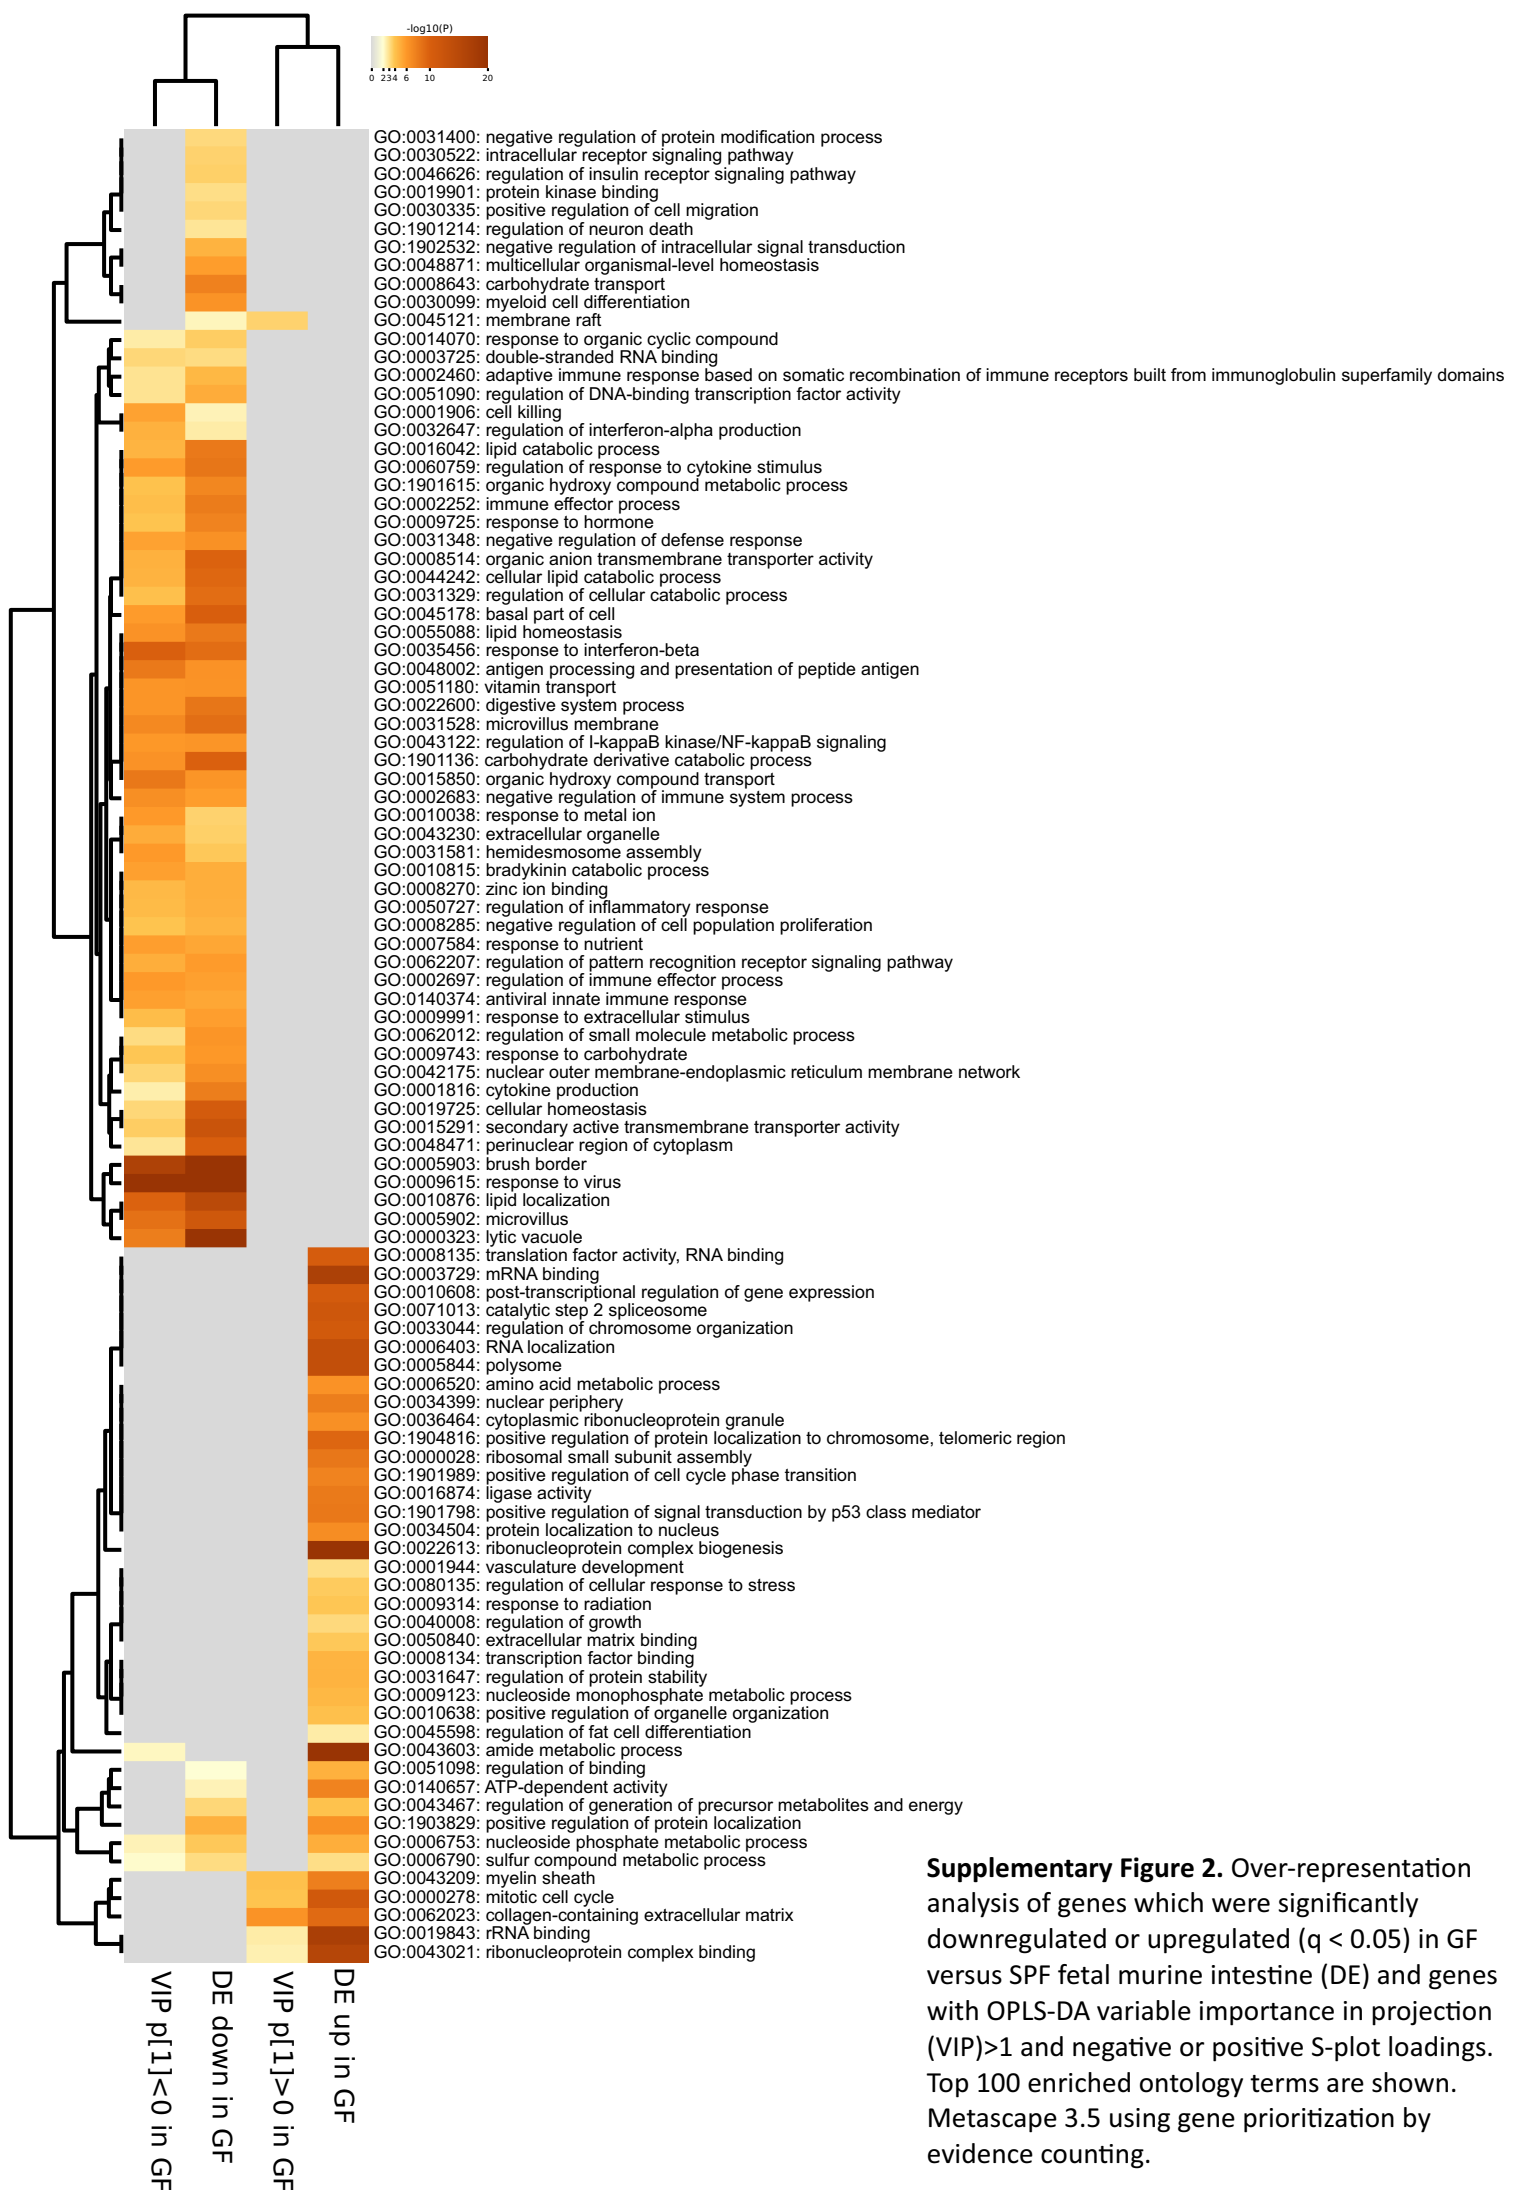

**Supplementary Figure 2.** Over-representation analysis of genes which were significantly downregulated or upregulated ( $q < 0.05$ ) in GF versus SPF fetal murine intestine (DE) and genes with OPLS-DA variable importance in projection (VIP) > 1 and negative or positive S-plot loadings. Top 100 enriched ontology terms are shown. Metascape 3.5 using gene prioritization by evidence counting.

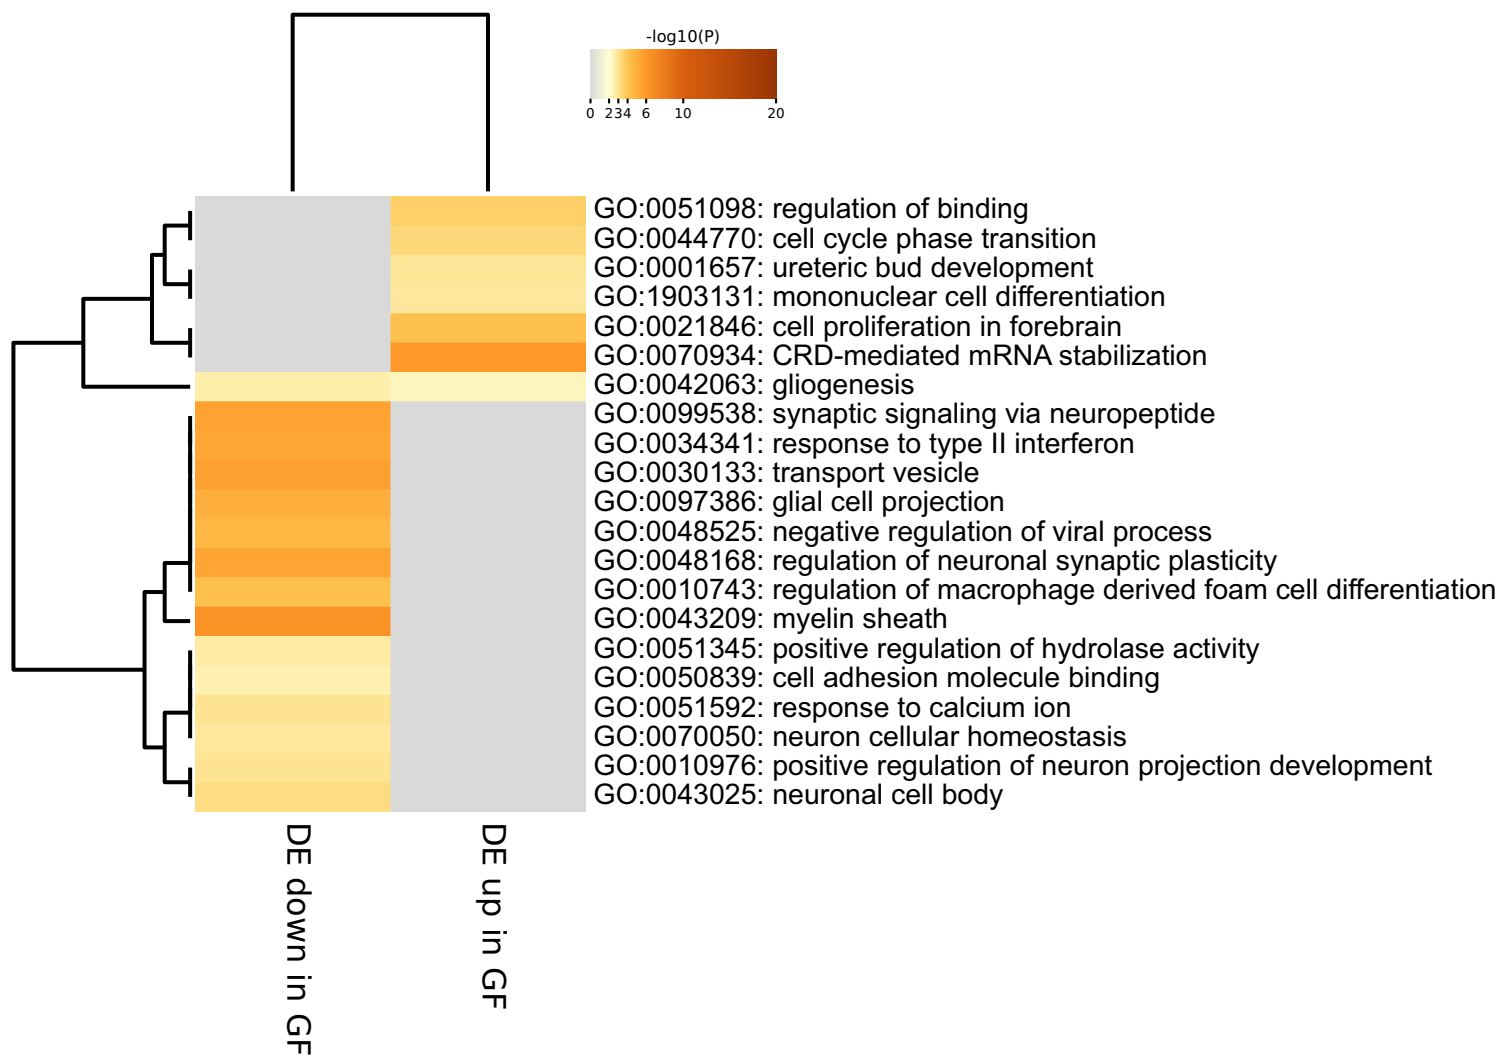

**Supplementary Figure 3.** Over-representation analysis of genes which were significantly downregulated or upregulated ( $q < 0.05$ ) in GF versus SPF fetal murine brain. Metascape 3.5 using gene prioritization by evidence counting.

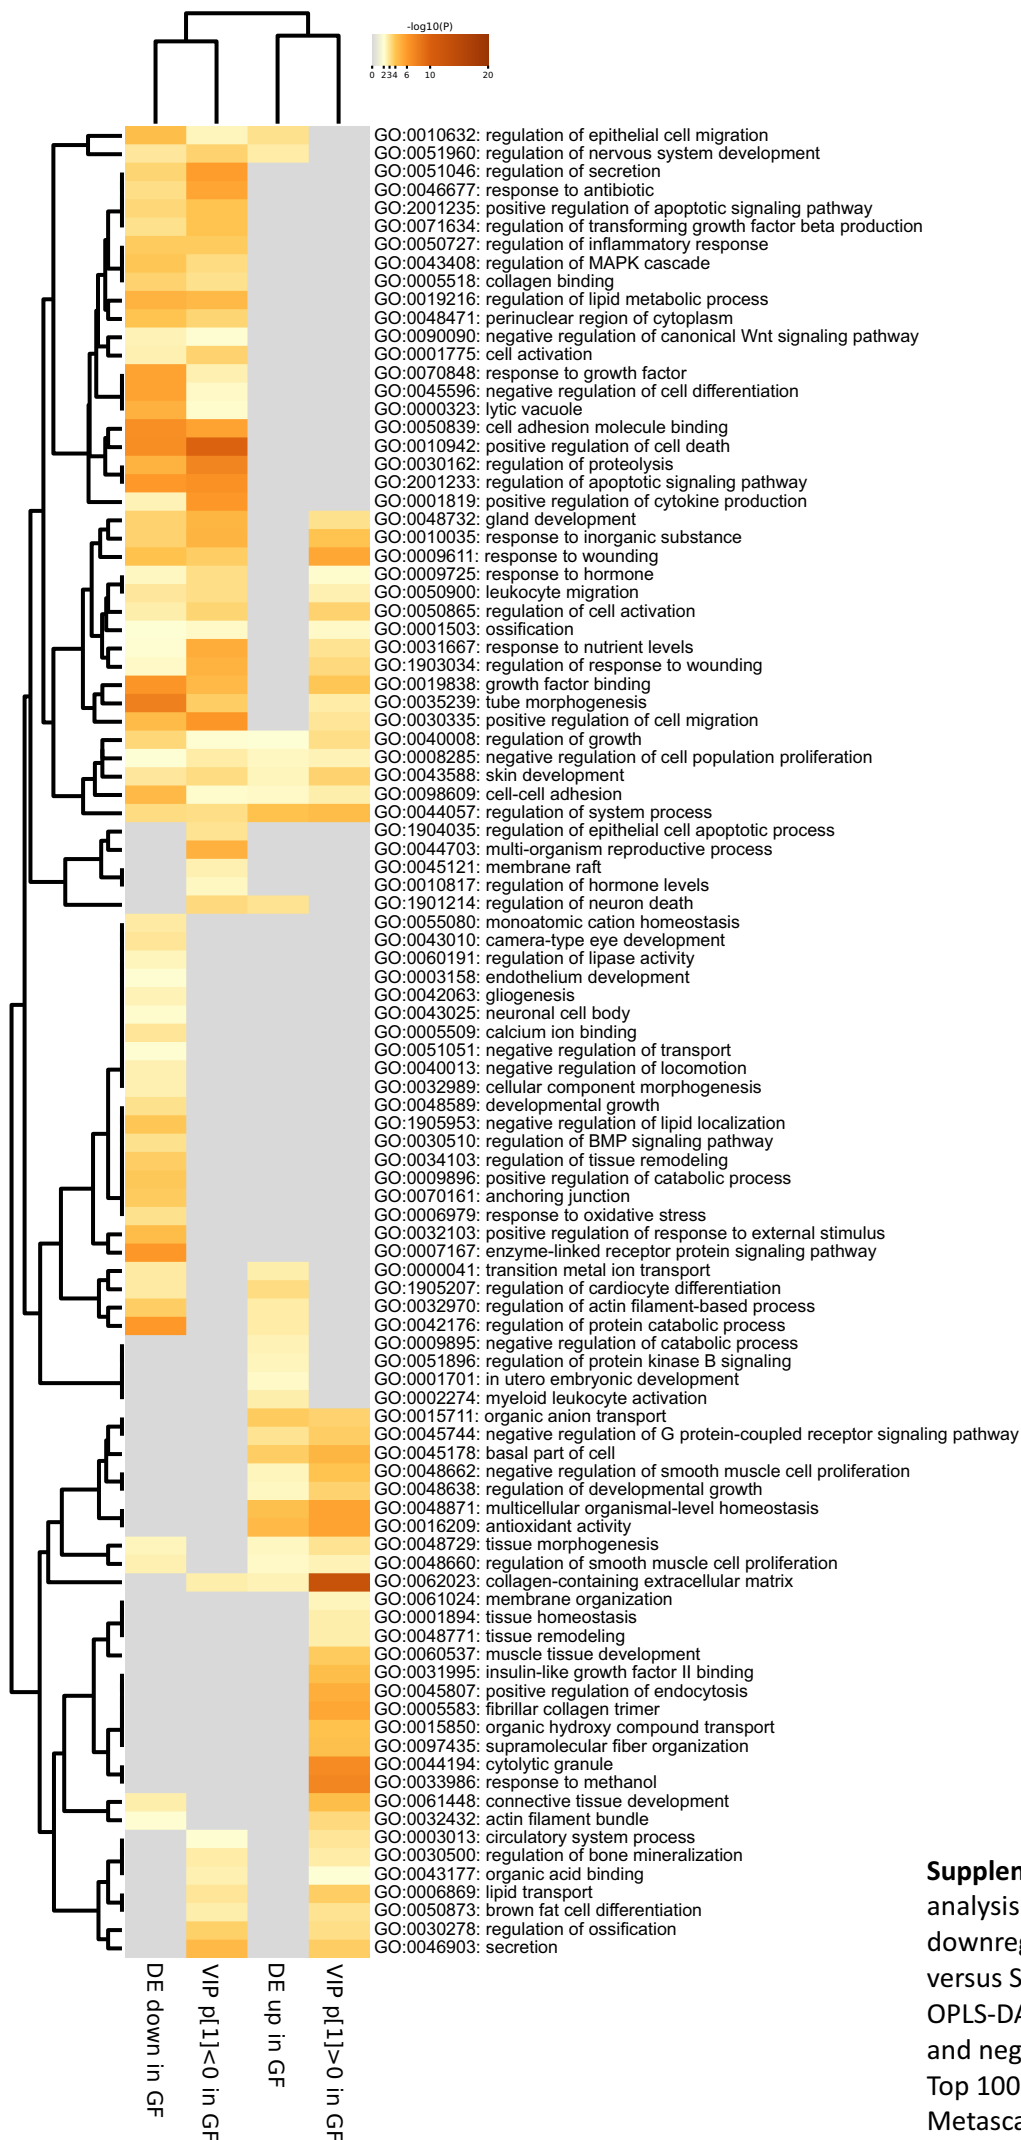

**Supplementary Figure 4.** Over-representation analysis of genes which were significantly downregulated or upregulated ( $q < 0.05$ ) in GF versus SPF murine placenta (DE) and genes with OPLS-DA variable importance in projection (VIP)>1 and negative or positive S-plot loadings. Top 100 enriched ontology terms are shown. Metascape 3.5 using gene prioritization by evidence counting.

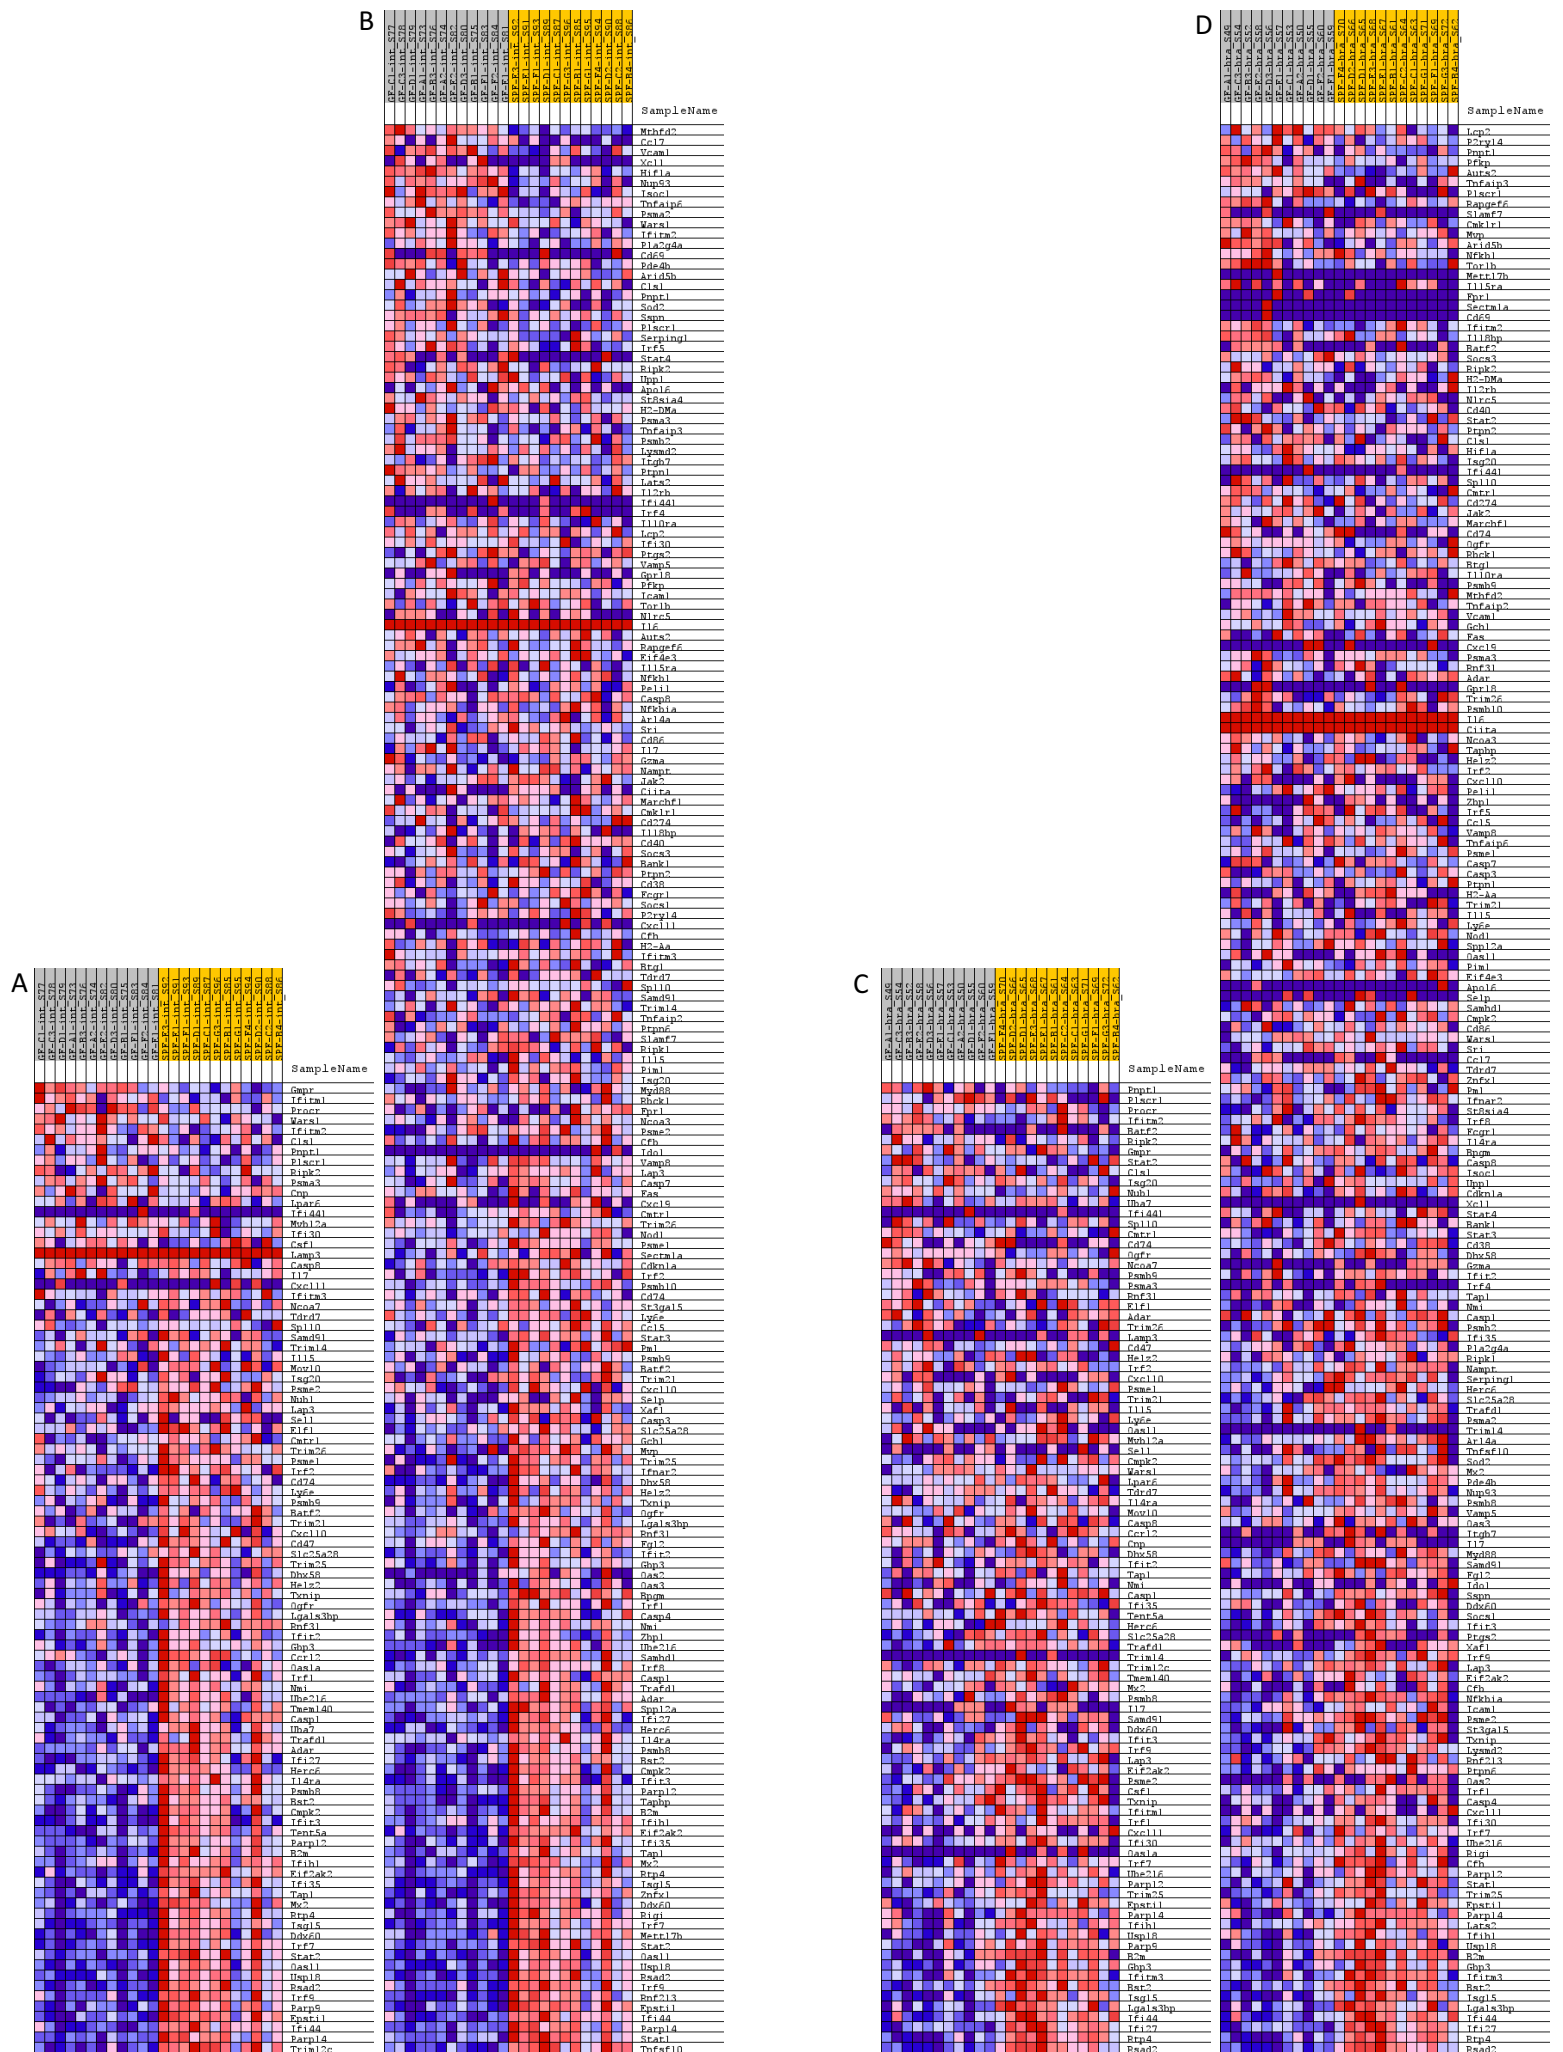

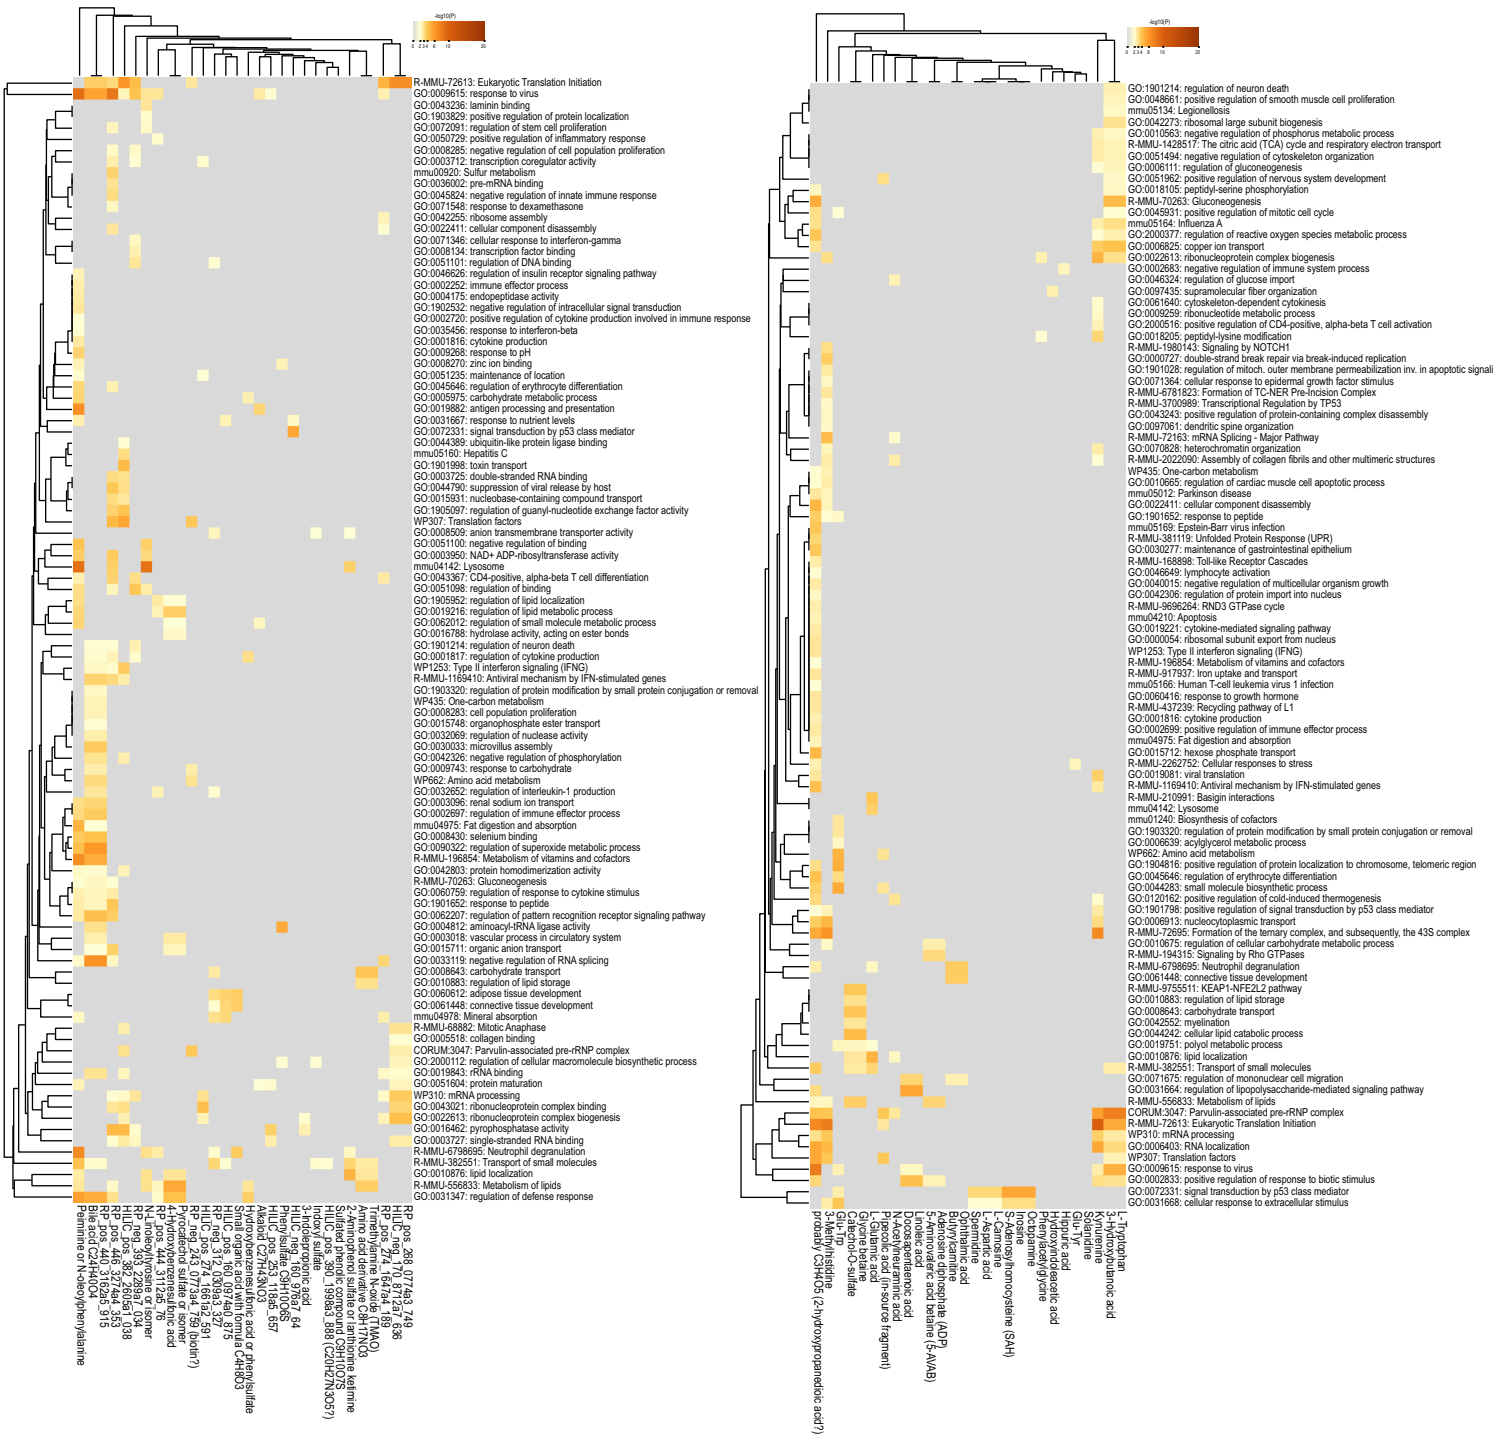

**Supplementary Figure 6. Over-representation analysis of genes strongly associated with metabolites in fetal intestine.** Highest-scoring molecular features missing from GF fetuses (left) and highest-scoring annotated metabolites more abundant in SPF fetuses (right). Top 100 enriched ontology terms are shown. Here, non-selective picking of ontology clusters was used.

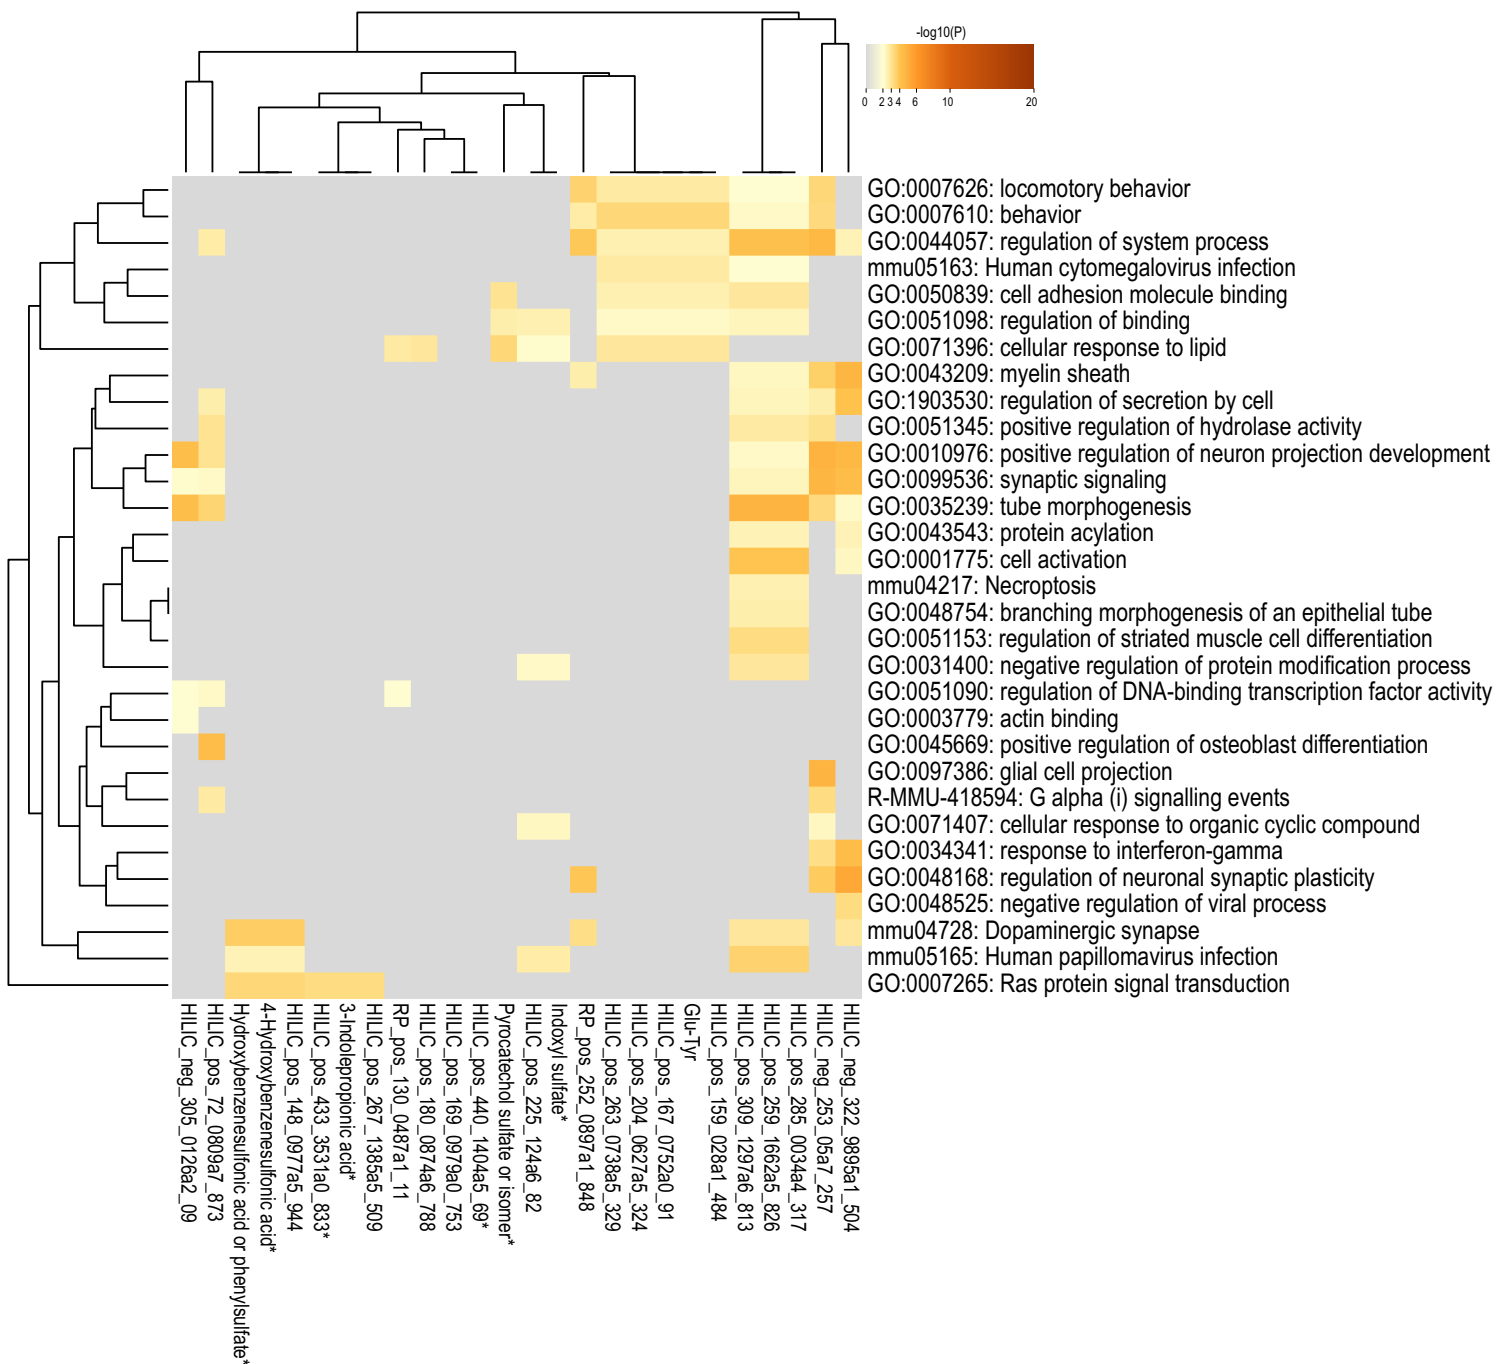

**Supplementary Figure 7. Over-representation analysis of genes strongly associated with metabolites in fetal brain.** Metabolites missing from GF fetuses are indicated by \*. Top 100 enriched ontology terms are shown. Here, non-selective picking of ontology clusters was used.



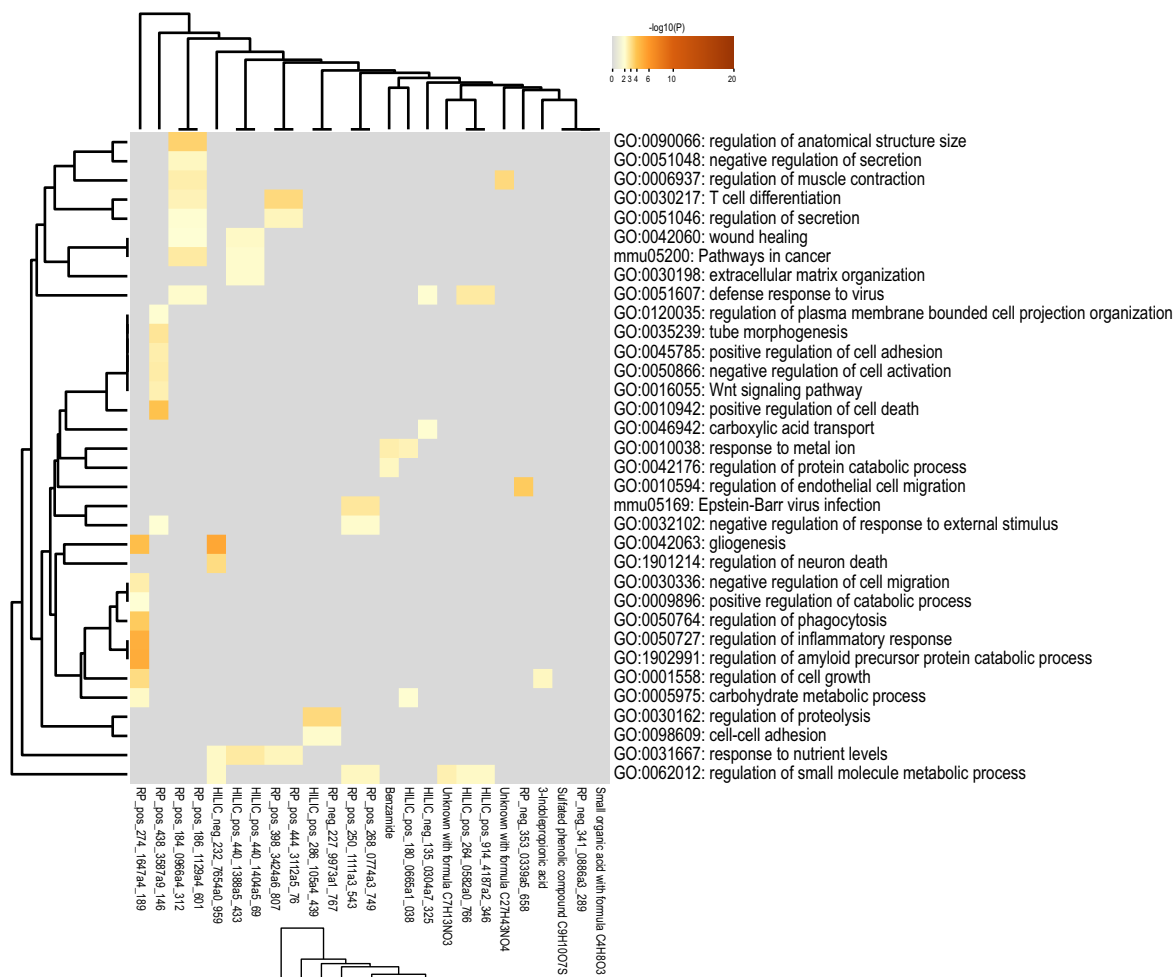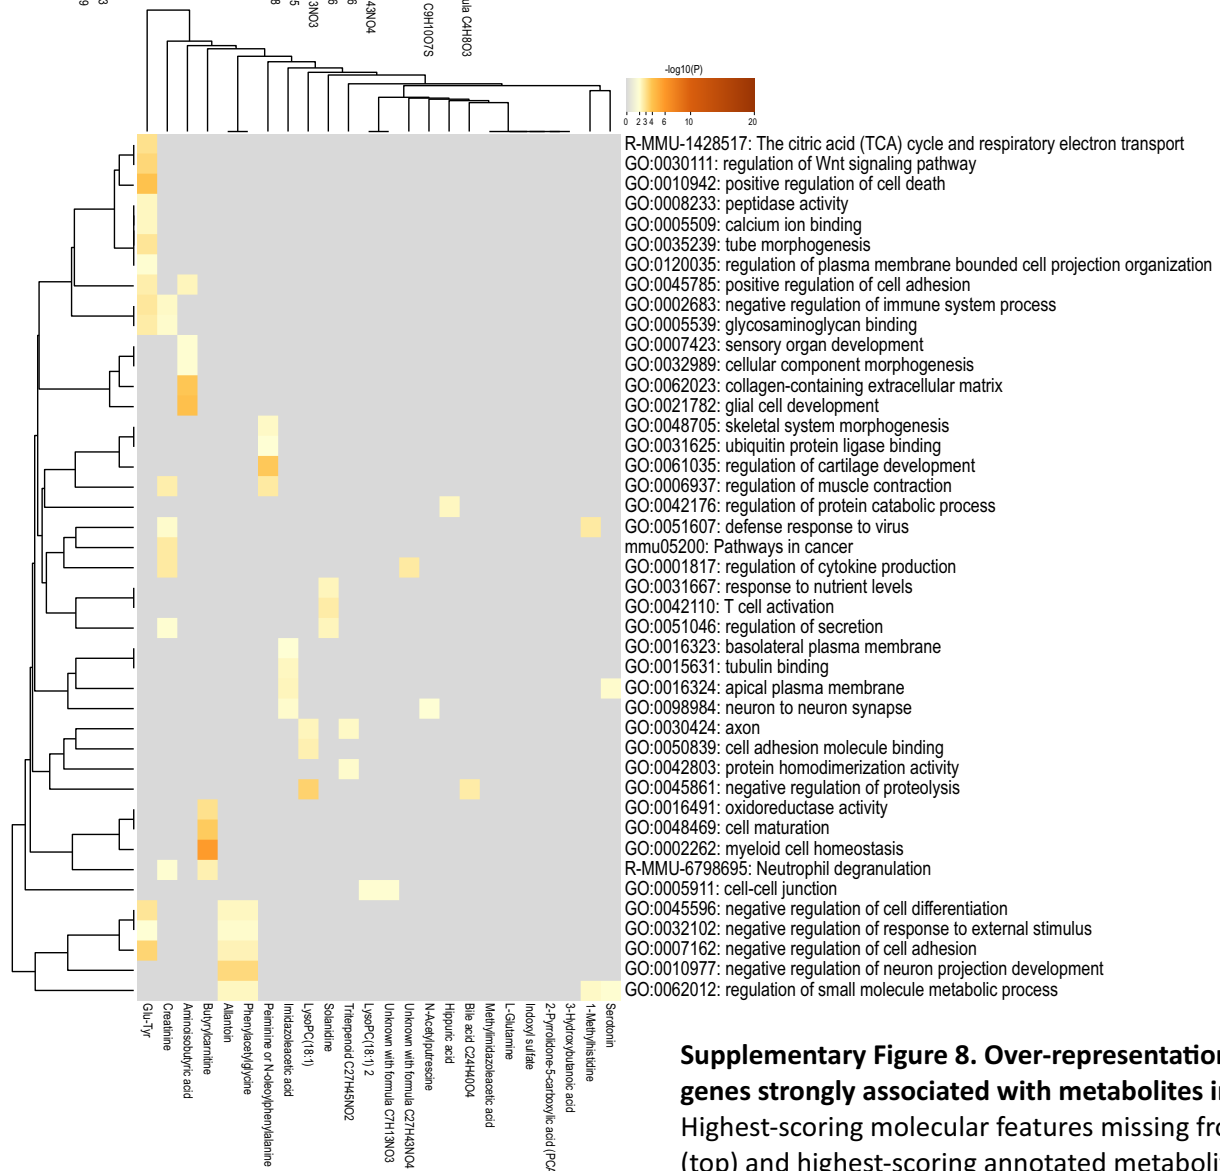

**Supplementary Figure 8. Over-representation analysis of genes strongly associated with metabolites in placenta.** Highest-scoring molecular features missing from GF fetuses (top) and highest-scoring annotated metabolites more abundant in SPF fetuses (bottom). Here, non-selective picking of ontology clusters was used.
